# Supplementary material for: Relationship Between Ambient Temperature and Humidity and Visits to Mental Health Emergency Departments in Québec
Source: Atypon-hosted journal article supplement (doi:10.1176/appi.ps.201100485), 2012-11-01
Supplement: 1150_ds001.pdf [file 1150_ds001.pdf]

## Online Appendix

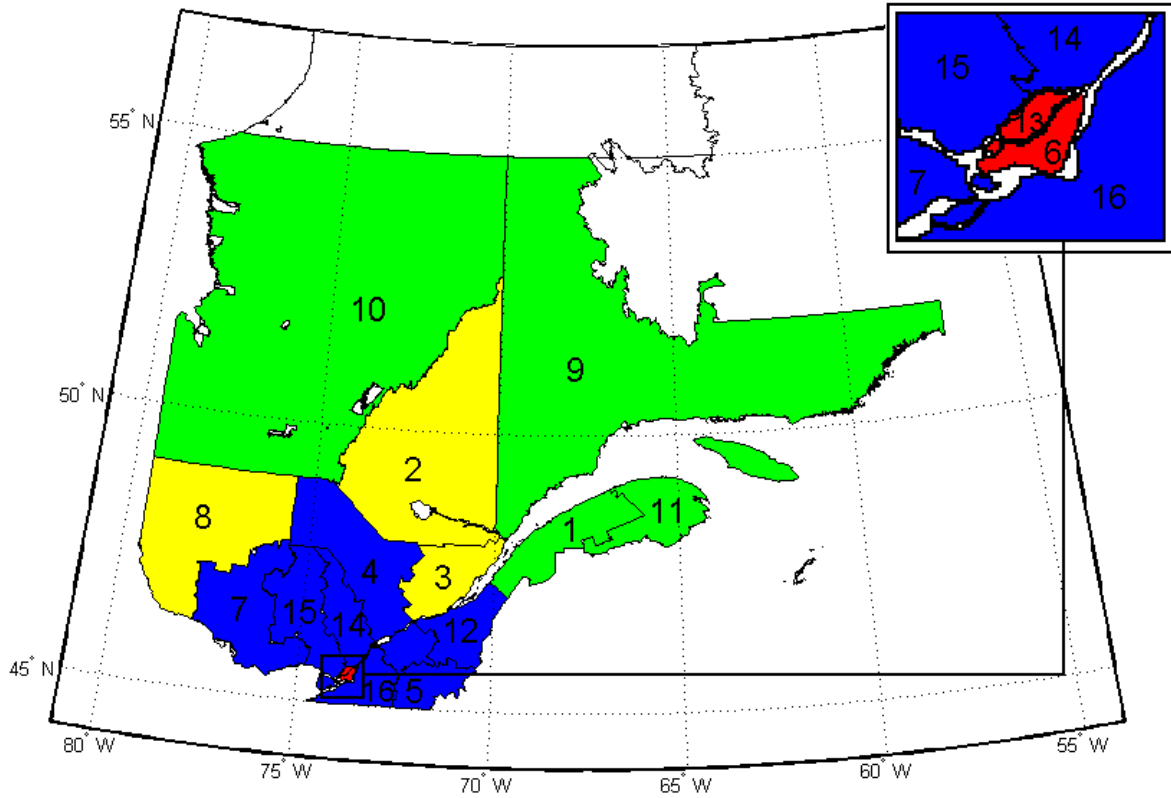

**Figure: Homogenous meteorological clustering of Québec Health regions. Red = metropolitan Montréal; blue = southern Québec; yellow = central Québec; green = maritime and northern Québec. Region 10 is excluded from the present study. From Martel et al, 2010 (8).**

Table: Grouping of health administrative regions into study areas. The total population and the population over 15 years old are provided by the 2001 Canadian census.

| Area         | Provincial health administrative region                                                                    | Total population | Population age 15 and over |
|--------------|------------------------------------------------------------------------------------------------------------|------------------|----------------------------|
| Area 1       | Montréal, Laval                                                                                            | 2,200,779        | 1,843,135                  |
| Area 2       | Mauricie et Centre du Québec, Estrie, Outaouais, Chaudière-Appalaches, Lanaudière, Laurentides, Montérégie | 3,670,463        | 2,980,452                  |
| Area 3       | Saguenay Lac-St-Jean, Capitale-Nationale, Abitibi-Témiscamingue                                            | 1,083,384        | 905,275                    |
| <b>Total</b> | All the above regions                                                                                      | 6,954,626        | 5,728,862                  |

Table: Total visits to the emergency department for mental and psychosocial problems by age for warm season (May to September) from 1995-2007, stratified by age in years and sex.

| Area         | 15-24  | 25-44   | 45-64  | 65-75  | >75    | Male    | Female  | Total   |
|--------------|--------|---------|--------|--------|--------|---------|---------|---------|
| 1            | 17,461 | 59,268  | 36,256 | 7,653  | 7,601  | 65,625  | 62,614  | 128,239 |
| 2            | 25,571 | 68,910  | 43,136 | 7,711  | 7,723  | 78,542  | 74,509  | 153,051 |
| 3            | 9,900  | 28,899  | 19,642 | 4,008  | 3,813  | 33,221  | 33,041  | 66,262  |
| <b>Total</b> | 52,932 | 157,077 | 99,034 | 19,372 | 19,137 | 177,388 | 170,164 | 347,552 |

**Table: Descriptive statistics of the daily mean temperature and daily mean relative humidity, for warm season (May to September) from 1995-2007, by grouped areas.**

| Area     | Temperature<br>Humidity | Lowest<br>during<br>period | Q1   | Median | Mean<br>of daily<br>means | Q3   | Highest<br>during<br>period |
|----------|-------------------------|----------------------------|------|--------|---------------------------|------|-----------------------------|
| <b>1</b> | °C                      | 5.1                        | 15.3 | 18.4   | 17.8                      | 20.8 | 27.8                        |
|          | %                       | 37.3                       | 67.1 | 73.1   | 71.9                      | 78.0 | 94.6                        |
| <b>2</b> | °C                      | 4.2                        | 14.4 | 17.4   | 16.9                      | 19.9 | 26.9                        |
|          | %                       | 42.7                       | 69.5 | 75.0   | 73.8                      | 79.3 | 93.8                        |
| <b>3</b> | °C                      | 3.4                        | 12.7 | 15.9   | 15.3                      | 18.3 | 25.4                        |
|          | %                       | 43.7                       | 69.0 | 74.2   | 73.2                      | 78.5 | 91.9                        |

**Notes:**

Daily mean temperature or humidity = (daily maximum + daily minimum) / 2.

Lowest during period = lowest daily mean temperature or humidity during period.

Q1 and Q3 = first and third quartiles of daily mean temperature or humidity during period; 50% of data are found between these values.

Median = median of daily mean temperature or humidity during period.

Mean = mean of daily mean temperature or humidity during period.

Highest during period = highest daily mean temperature or humidity during period.

+

**Table: Incidence rate ratio (IRR) for mean daily relative humidity.**

| Area     | Age | IRR at 70%  |                 | IRR at 80%  |                  | IRR at 90%  |                  |
|----------|-----|-------------|-----------------|-------------|------------------|-------------|------------------|
|          |     | IRR         | 95% CI          | IRR         | 95% CI           | IRR         | 95% CI           |
| <b>1</b> | <65 | <b>1.00</b> | <b>.99-1.00</b> | <b>1.02</b> | <b>1.01-1.02</b> | <b>1.04</b> | <b>1.01-1.06</b> |
|          | ≥65 | 1.00        | 1.00-1.00       | 1.01        | .99-1.02         | 1.01        | .99-1.03         |
| <b>2</b> | <65 | <b>.99</b>  | <b>.98-1.00</b> | 1.00        | .99-1.01         | <b>1.10</b> | <b>1.05-1.14</b> |
|          | ≥65 | 1.00        | 1.00-1.00       | 1.00        | 1.00-1.00        | 1.00        | 1.00-1.00        |
| <b>3</b> | <65 | .99         | .98-1.00        | <b>1.02</b> | <b>1.01-1.04</b> | 1.04        | .98-1.10         |
|          | ≥65 | 1.01        | .99-1.02        | .99         | .96-1.01         | .97         | .91-1.04         |

**Note:**

Bold IRR indicate statistical significance by 95% confidence interval prior to rounding to 2 decimal places.

**Figures:**

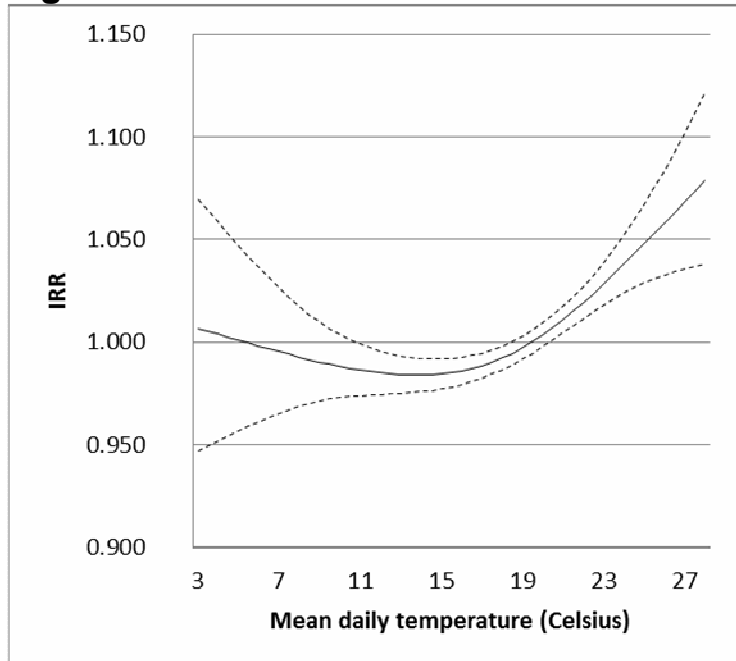

**Figure: Incidence rate ratio (IRR) of daily emergency department visits by mean daily temperature among persons under age 65 in Area 1.**

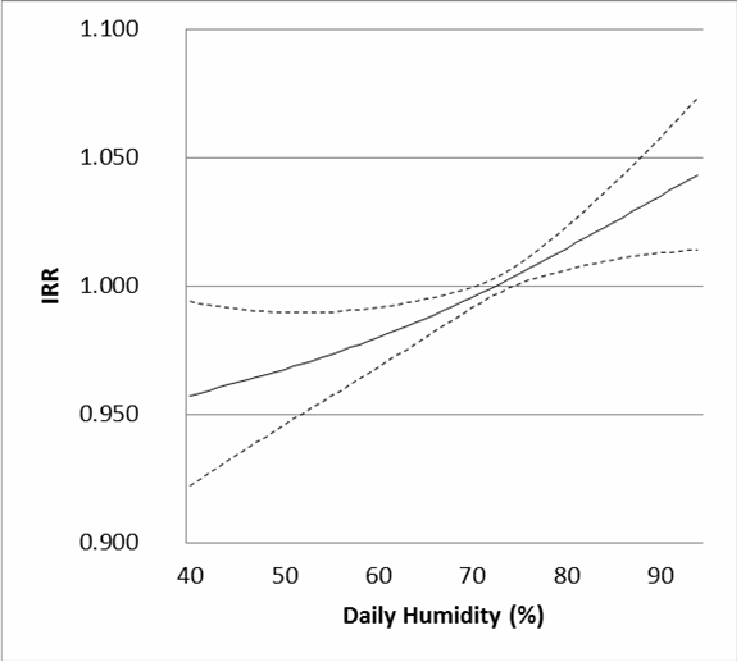

**Figure: Incidence rate ratio (IRR) of daily emergency department visits by relative humidity among persons under age 65 in Area 1.**

**Additional references on vulnerability to environmental heat among persons with mental health problems:**

1. Chong TW, Castle DJ. Layer upon layer: thermoregulation in schizophrenia. *Schizophr Res.* 2004;69(2-3):149-57.
2. Viron MJ, Stern TA. The Impact of Serious Mental Illness on Health and Healthcare. *Psychosomatics.* 2010;51(6):458-65.
3. Cuddy MLS. The Effects of Drugs on Thermoregulation. *AACN Advanced Critical Care.* 2004;15(2):238-53.
4. Eyer F, Zilker T. Bench-to-bedside review: Mechanisms and management of hyperthermia due to toxicity. *Critical Care.* 2007;11(6):236.
5. Reilly TH, Kirk MA. Atypical Antipsychotics and Newer Antidepressants. *Emergency medicine clinics of North America.* 2007;25(2):477-97.
